# Supplementary material
Source: publisher site journal article supplement (https://www.spandidos-publications.com/4053/downloadSupplementary)

Figure S1. Flow cytometric analysis of OC cells after HJURP knockdown. Flow cytometry plots indicate the cell cycle distribution in HSC4 (A) and Ca9-22 (B) cells following si-HJURP transfection. Knockdown of HJURP expression increased the proportion of cells with G2/M phase. HJURP, Holliday junction recognition protein; OC, oral cancer.

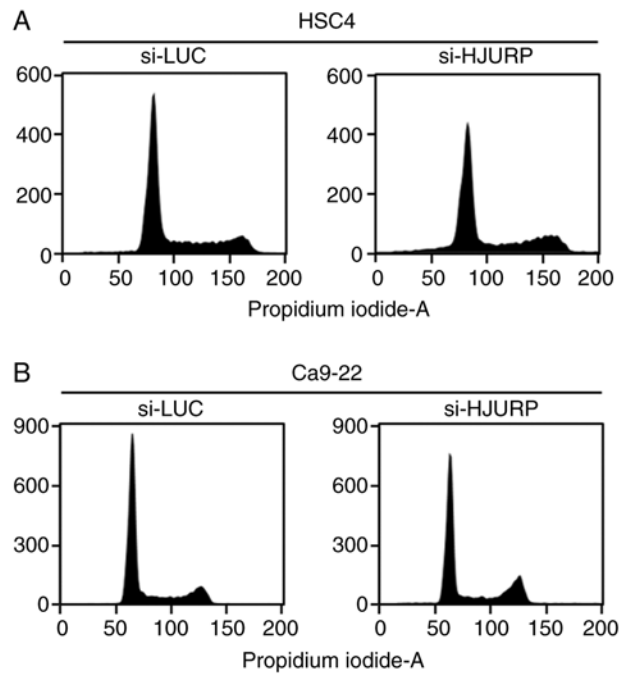

Figure S2. Promotion of the OC cell growth by enforced HJURP expression. (A) Transient overexpression of Myc-tagged HJURP protein detected by western blotting using anti-Myc-Tag antibody. (B) MTT assay of HSC2 and SCC-9 cells transfected with the HJURP-expressing plasmids or control Mock vectors ( $^{***}P < 0.001$  vs. mock). (C) Colony formation assay of HSC2 and SCC-9 cells after transfection of HJURP-expressing and control plasmid. HJURP, Holliday junction recognition protein; OC, oral cancer.

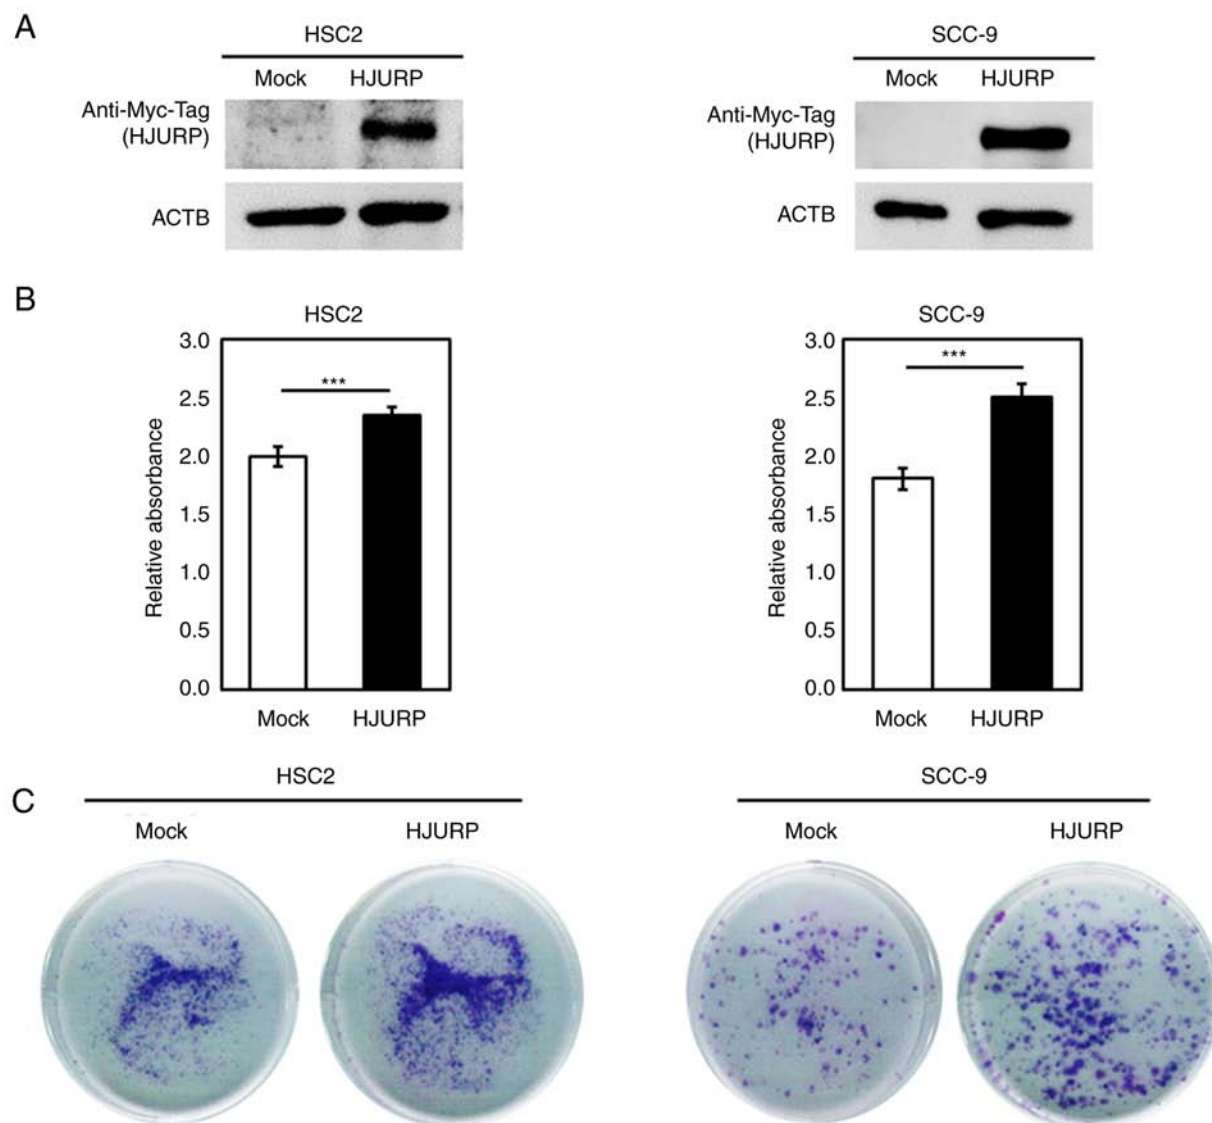

Supplement: Supplementary file 1 [file downloadSupplementary]
